# Supplementary material
Source: Research Square preprint supplement (doi:10.21203/rs.3.rs-8811000/v1)
Supplement: Supplementary file 1 [file e5ed7f0043a4c68d4161d551.xlsx]

## Sheet: Sheet1
Group1 (with complications)																	Current medications			Investigations
	Weight	Height	BMI	Cigarette smoking	Duration (years)	Diabetes mellitus	Duration (Years)	Hypertension	Duration (Months)	History of cardiovascular disease	History of peripheral arterial disease	History of cerebrovascular disease	History of nephropathy	History of neuropathy	History of retinopathy	Previous medical history	antihypertensive	antidiabetic	others	ECHO	Fundus examination	ABI	CIMT	Peripheral systolic blood pressure	peripheral diastolic Bp	MeanperipheralBP	Central blood pressure			Fasting blood sugar (FBS)	, 2 hour plasma blood glucose	Glycated hemoglobin (HbA1c)	Albumin/Createnine Ratio	Estimated glomerular filtration rate	LDL	HDL	TG	Cholesterol
																											Central systolic Bp	Central diastolic Bp	Augmentation index 75
1	110	1.65	40.4	No	0	Yes	3	Yes	12	IHD	No	No	No	Yes	No	None	B-bloker+Diuretis	glibenclamide 5mg+metformin 850 mg	rosvastatin 10mg+ASP100+nitrate	EF60%.hypokinsis of apex and all apical walls and mid IVS.sclerotic aortic valve	Normal	1.05	0.9	138	82	100	131	84	30	173	209	8.4	5.14	109	108.8	32	186	176
2	94	1.7	32.5	No	0	Yes	5	Yes	12	No	No	No	No	Yes	No	None	ACEI	pioglitazone 15 mg+metformin 1000mg+vildagliptin 50 mg	no	EF 61%.normal	Normal	1.01	0.6	113	75	88	106	76	7	135	219	8.3	7.01	94	90	49	151	181
3	132	1.6	51.6	Yes	10	Yes	25	Yes	9	IHD	No	No	No	Yes	No	None	ARBS	insline mixtard+insuline neutral human	clopidogrel 75mg+nicorandil 2.5 mg normal	EF60%.hypokinsis of mid and basal lat.wall and mild hypokinsisof mid and basal post.wall.diastolic dysfunction grade 1	Normal	1.07	0.9	112	68	83	102	69	41	408	519	13.9	66.3	104	125	40	121	123
4	115	1.7	39.8	Yes	12	Yes	20	Yes	7	IHD	No	No	No	Yes	No	Benign prostatic hyperplasia	ACEI+B-blocker	dapagliflozin 10mg+vildagliptin 50mg+metformin 1000mg	Aspirin 75mg+atorvastatin40mg normal	EF55%.inferior wall hypokinsia.diastolic dysfunction grade 1	Normal	1.04	0.7	110	67	81	102	68	30	120	180	7.5	2.4	101	135	41	120	175
5	76	1.56	31.2	No	0	Yes	2	Yes	12	No	No	No	No	Yes	No	Cervical disc prolapse	ACEI+B-blocker	empagliflozin 10mg+metformin 1000mg+gliclazide 60mg	rosuvastatin 10mg	EF68%.normal	Normal	1.11	0.9	135	73	94	124	75	25	160	228	10	4.5	105	44	55	100	185
6	59	1.69	20.7	No	0	Yes	10	Yes	4	No	No	No	No	Yes	No	Tonsillectomy	ARBS+Diuretics	insulin mixtard +vildagliptin 50mg+metformin 1000mg	atorvastatin 20mg	EF 64%.normal.trace TR	Mild NPDR on left eye	1.07	0.7	112	67	82	103	68	17	233	342	10	15.2	103	70	42	127	248
7	113	1.65	41.5	No	0	Yes	9	Yes	7	IHD	No	No	No	Yes	No	Cataract operation	B-blocker+Diuretics	insulin mixtard	rosuvastatin 5mg +ASA 100mg	EF60%.hypokinsis of mid and basal inferior wall.moderate AR.diastolic dysfunction grade 1	Normal	1.13	0.9	154	100	118	146	102	44	285	463	11	25.09	99.2	124	41	214	208
8	87	1.65	32	Yes	20	Yes	1	Yes	12	No	No	No	No	Yes	No	None	ACEI+B-blocker	inuslin glargiine+insulin neutral human	atorvastatin 40 mg	EF 64%.normal	Normal	1.2	0.7	105	77	86	101	78	18	220	275	12.4	57.9	76	117	49	114	179
9	89	1.65	32.7	No	0	Yes	11	Yes	2	No	No	No	No	Yes	No	Fatty liver	CCB+Diuretis	gliclazide 60mg+vildagliptin 50mg+metformin 1000mg	no	EF 63%.thickened aortic valve with mod.AR	Normal	1.09	0.8	114	71	85	104	73	31	128	222	8.9	5.63	119.5	108	43	251	202
10	100	1.65	36.7	Yes	13	Yes	6	Yes	3	No	No	No	No	Yes	No	None	ARBS+Diuretics	insulin mixtard	rosuvastatin 5 mg	EF66%.normal	Normal	1.15	0.9	142	97	112	129	99	19	158	224	7.5	5.0599	78	107	55	71	176
11	95	1.8	29.3	No	0	Yes	3	Yes	8	No	Intermittent claudiation	No	No	No	No	None	ACEI	inslin mixtard	no	EF60%.normal	Normal	0.82	0.9	145	106	119	134	108	26	148	258	6.4	12.88	98	152	39	122	225
12	60	1.35	32.9	No	0	Yes	3	Yes	1	No	No	No	No	Yes	No	None	ACEI+Diuretics	vildagliptin 50mg+metformin 1000 mg	no	EF 61%.normal	Normal	1.04	0.7	112	72	85	104	73	10	103	244	7.7	33.81	93	149	49	139	223
13	87	1.63	32.7	No	0	Yes	4	Yes	1	No	No	No	No	Yes	Yes	None	b-bloker	vildagliptin 50mg+metformin 1000 mg	rosuvastatin 10mg	EF 67%.normal	NPDR	1.06	0.8	129	75	93	118	77	19	224	210	8.2	13.38	70	163.2	52	224	249
14	108	1.75	35.3	No	0	Yes	7	Yes	9	No	No	Transient ischemic attack	No	Yes	No	None	b-blocker	insulin mixtard	rosuvastatin 10mg	EF 61%.diastolic dysfunction grade 1	Normal	1.02	0.9	156	87	110	149	89	29	108	125	7.2	7.91	108	170.6	41	130	128
15	82	1.6	32	No	0	Yes	8	Yes	6	No	No	No	No	Yes	No	Knee operation	CCB+B-blocker	gliclazide 60mg+vildagliptin 50mg+metformin 1000mg	rosuvastatin 20mg	EF65%.normal	Normal	1.07	0.8	105	65	78	97	66	19	482	558	13.4	6.15	81.85	87.6	50	137	165
16	92	1.54	38.8	No	0	Yes	2	Yes	7	IHD	No	No	No	Yes	No	None	ACEI+Diuretics	pioglitazone 15 mg+metformin 1000mg+vildagliptin 50 mg	Atorvastatin 40 mg	EF59%.Akinetic apex,hypokinetic all apical segments,mild hypokinsia of midand basal ant. And lat. Walls.dilated LA and impaired dystolic dysfunction grade 1.mild MR and mod TR	Normal	1.03	0.9	132	83	99	123	84	42	90	144	6.6	1.63	103	118	35	165	207
17	63.5	1.6	24.8	Yes	11	Yes	20	Yes	12	No	No	No	Yes	Yes	Yes	None	CCB	insulin mixtard	rosuvastatin 20mg	EF 62%.normal	NPDR	1.11	0.8	108	67	125	95	69	14	78	155	8.5	25.35	61	70.6	56	87	123
18	90	1.6	35.2	No	0	Yes	10	Yes	9	IHD	No	No	Yes	No	No	None	B-bloker+ACEI	insulin mixtard	atorvastatin 80 mg	EF60%.hypokinsis of mid and basal post.wall and basal inferior wall.moderate MR.diastolic dysfunction grade 1	Normal	1.12	0.9	142	109	120	135	110	20	126	210	7.1	111.83	32	65	23	182	171
19	65	1.62	24.8	No	0	Yes	3	Yes	12	No	No	No	No	Yes	No	Appendicectomy	b-blocker	gliclazide 60mg+vildagliptin 50mg+metformin 1000mg	no	EF61%.normal	Normal	1.02	0.6	127	84	98	114	86	18	181	216	7.7	50.26	95.5	58.6	42	62	113
20	93	1.65	34.2	No	0	Yes	2	Yes	1	No	No	No	No	Yes	No	Cataract operation	b-blocker	insulin mixtard	no	EF61%.mild MR and AR	Normal	1.35	0.9	148	83	105	127	83	33	241	267	8.3	14.6	73	25	70	189	228
21	74	1.57	30	No	0	Yes	20	Yes	1	No	No	No	Yes	Yes	No	None	ARBS+Diuretics	insulin mixtard	no	EF66%.normal	Normal	1.07	0.9	135	86	102	127	88	30	165	250	7.9	252.78	66	127	54	123	205
22	130	1.76	42	No	0	Yes	12	Yes	9	No	No	Brain stroke	No	Yes	No	None	ACEI	gliclazide 60mg	rosuvastatin 5 mg	EF 54%.dilated LA.moderate MR	Normal	1.04	0.9	153	98	116	144	100	31	136	213	12.7	7.82	112	110	30	241	187
23	85	1.62	32	Yes	35	Yes	15	Yes	1	No	No	No	Yes	No	No	None	CCB	insulin mixtard	no	EF64%.normal	Normal	1.06	0.9	131	82	98	115	82	2	126	135	6.8	7.84	54	74	49	102	143
24	92	1.68	32.6	Yes	17	Yes	9	Yes	5	No	No	No	No	Yes	No	Cataract operation	ARBS	inslin mixtard	no	EF 63%.normal	Normal	1.01	0.8	138	74	95	128	76	17	136	185	8	12.69	105	67	35	167	130
25	115	1.54	48.5	Yes	12	Yes	10	Yes	12	IHD	No	No	No	No	No	None	B-bloker+Diuretis	insulin mixtard	atorvastatin 40mg	EF 54%.dilated LA.hypokinsis of mid and basal post.and lat.walls and basal inferior wall.mild MR	Normal	1.1	0.9	145	89	108	133	91	27	148	213	6.4	7.85	107	89	30	152	149
26	95	1.55	39.5	No	0	Yes	0.58	Yes	7	No	No	No	No	Yes	No	None	ACEI+Diuretics	empagliflozin10+linagliptin 5mg	no	EF 67%.normal	Normal	1.09	0.8	137	84	102	127	86	21	141	174	7.2	10	93	64	30	190	132
27	100	1.6	39	No	0	Yes	1	Yes	12	IHD	No	No	Yes	Yes	No	Bronchial asthema	ARBS+b-bloker	insulin mixtard	no	EF 62%.mild hypokinsis of mid and basal inferior wall.mild AR.diastolic dysfunction grade 1	Normal	1.13	0.9	167	105	126	154	108	26	417	495	8.4	108.68	31	180	30	230	235
28	65	1.58	26.03	Yes	19	Yes	0.17	Yes	2	No	No	No	No	Yes	No	Renal stone	CCB+B-blocker	insulin mixtard	rosuvastatin 5 mg	EF 62%.normal	Normal	1.08	0.8	138	104	115	129	106	19	167	322	9	6.33	98	103	35	759	223
29	64	1.65	23.5	No	0	Yes	7	Yes	1	No	No	No	No	Yes	No	Cervical disc prolapse	b-blocker	glibenclamide 5 mg +metformin1000 mg	atorvastatin 80 mg	EF 59%.trace TR	Normal	1.06	0.9	145	76	99	129	79	27	157	212	8.6	19	115	49	54	140	131
30	90	1.55	37.5	No	0	Yes	8	Yes	8	No	No	No	Yes	Yes	No	None	CCB	insulin mixtard	no	EF 63%.normal	Normal	1.09	0.8	138	87	104	131	88	30	124	190	7.1	183.94	87	134	59	70	207
31	110	1.7	38	No	0	Yes	17	Yes	7	No	No	Brain stroke	Yes	No	No	Tonsillectomy	CCB	insulin mixtard	atorvastatin 80 mg	EF 67%. Dilated LA. Diastolic dysfunction grade 1.trace MR and TR	Normal	1.1	0.9	146	95	112	132	97	37	74	167	8	41.45	31	144	46	133	75
32	95	1.55	39.5	No	0	Yes	3	Yes	1	No	No	No	No	Yes	No	None	ARBS	glibenclamide 5 mg +metformin500 mg	no	EF 59%.normal	Normal	1.13	0.7	132	80	97	126	81	13	133	234	13.6	4.36	114	97	34	392	209
33	95	1.65	34.9	Yes	12	Yes	6	Yes	12	IHD	No	No	No	No	No	None	B-blocker+Diuretics	inslin mixtard	atorvastatin 80 mg +ASA+nitra	EF62%.hypokinsia of apex.dilated LA.diastolic dysfunction grade 1	Normal	1.12	0.9	152	105	121	143	107	26	175	221	7.8	17.02	86	115	29	212	213
34	80	1.7	27.7	Yes	15	Yes	0.04	Yes	1	No	No	No	No	Yes	No	None	ARDS+Diuretics	glibenclamide 5 mg+metformin 1000 mg+empagliflozin 10mg	no	EF 60%.normal	Normal	1.07	0.7	138	102	114	130	104	11	341	500	11.5	22	87	84	56	179	149
35	150	1.6	58.6	No	0	Yes	18	Yes	12	No	No	No	No	Yes	Yes	None	ACEI+Diuretics	insulin mixtard	atorvastatin 40 mg	EF63%.trace MR	Maculopathy	1.16	0.9	126	82	97	119	84	27	96	125	7.5	2.67	97	110	46	119	180
36	125	1.87	35.7	Yes	25	Yes	16	Yes	7	IHD	No	No	No	Yes	No	None	ARBS	dapagliflozin 10mg+metformin 500mg +glimepride 2mg	atorvastatin 40mg+ASA 100mg	EF 69%.diastolic dysfunction grade 1.mild MR	Normal	1.11	0.9	153	86	108	144	88	39	261	323	10.2	6.06	102	135	70	102	225
37	61	1.65	22.4	No	0	Yes	1	Yes	12	No	No	No	No	Yes	No	None	ACEI	insulin mixtard	atorvastatin 40 mg	EF 66%.normal	Normal	1.13	0.7	115	86	96	106	87	15	79	129	8.4	4.18	95	46	63	119	133
38	120	1.65	44.1	No	0	Yes	11	Yes	9	No	No	Brain stroke	Yes	No	No	Fatty liver	ARBS+Diuretics	insulin mixtard	atorvastatin 40mg +ASA 75	EF 63%.diastolic dysfunction grade 1	Normal	1.02	0.9	137	92	107	135	93	42	493	540	13.7	103.66	57	92	42	157	165
39	80	1.65	29.4	No	0	Yes	8	Yes	2	No	No	No	Yes	No	Yes	None	ACEI	insulin mixtard	rosuvastatin 10mg	EF 67%.normal	Retinal hemorrhage and exdate	1.15	0.9	117	76	90	101	78	2	179	330	12	352.46	64	65	30	239	143
40	80	1.4	40.8	No	0	Yes	1.5	Yes	6	No	No	No	No	Yes	No	None	CCB+B-blocker	sitagliptin 50 mg+metformin 1000mg	no	EF62%.sclerotic aortic valve and mild AR.	Normal	1.08	0.9	121	86	98	115	88	29	184	151	9.9	11.3	101	103	66	101	189
41	114	1.65	41.9	No	0	Yes	5	Yes	3	No	No	No	No	Yes	No	Fatty liver	b-blocker+diuretics	gliclazide 60 mg	no	EF 66%.normal	Normal	1.14	0.9	111	73	86	104	74	9	327	465	12.1	7.23	110	157	62	178	255
42	98	1.7	33.9	No	0	Yes	12	Yes	9	IHD	No	No	Yes	No	No	None	B-bloker+ACEI	insulin mixtard	atorvastatin 40mg+ASA 100mg+nitra	EF60%.thickened Aortic valve with mod.AR.Diastolic dysfunction grade 1	Normal	1.03	0.9	169	105	126	151	108	38	131	210	7.3	125.58	47	177	35	144	103
43	90	1.81	27.5	Yes	23	Yes	10	Yes	1	No	No	No	Yes	No	No	None	ARBS	insulin mixtard	rosuvastatin 5 mg	EF 63%.mild MR and moderate TR	Normal	1.08	0.7	134	88	103	121	90	23	87	131	5.8	53.09	68	72	34	107	127
44	65	1.6	25.4	No	0	Yes	6	Yes	12	No	No	No	Yes	No	No	None	ARBS	glibenclamide 5mg +500 mg	no	EF70%.trace AR and TR	Normal	1.12	0.8	112	80	91	106	81	20	80	107	9	156.66	57	89	41	159	162
45	85	1.63	32	No	0	Yes	0.04	Yes	12	No	No	No	No	Yes	No	None	ACEI+Diuretics	empagliflozin 10mg+gliclazide 60mg	no	EF 67%..moderate AR	Normal	1.04	0.8	124	75	91	117	76	47	166	216	8.5	7.1	111	38	36	245	240
46	90	1.82	27.2	Yes	20	Yes	15	Yes	2	No	No	No	Yes	Yes	No	None	ARBS+Diuretics	insulin mixtard	no	EF 62%.normal	Normal	1.09	0.8	112	85	94	106	86	4	185	101	8.6	66.52	55	150	45	213	296
47	92	1.62	35.1	No	0	Yes	12	Yes	12	No	No	Brain stroke	No	Yes	No	None	ARBS+Diuretics	insulin mixtard	atorvastatin 80 mg	EF 69%.dilated LA.sever MR and mild TR	Normal	1.1	0.9	163	80	108	150	82	30	224	305	12.9	13.06	84	127	40	80	185
48	85	1.6	33.2	No	0	Yes	5	Yes	8	No	No	No	Yes	Yes	No	None	ACEI	Insulin mixtard +metformin 1000mg	no	EF 62%.mild AR	Normal	1.07	0.9	140	78	99	126	80	20	106	107	8.6	876.83	62	119	32	73	166
49	90	1.7	31.1	No	0	Yes	9	Yes	7	No	No	Transient ischemic attack	No	No	No	Cataract operation	ACEI+B-blocker	insulin mixtard	rosuvastatin 10 mg	EF 63%.dilated LA.diastolic dysfunction grade 1	Normal	1.13	0.9	159	92	114	148	94	29	169	227	9.3	16	83	138.4	40	183	215
50	135	1.62	51.4	No	0	Yes	10	Yes	12	IHD	No	No	No	Yes	No	None	ARDS	insulin mixtard	Atorvastatin 40 mg	EF54%.dilated LA.Hypokinsis of mid and basal post.and lat.and basal inferior wall.mild MR	Normal	1.08	0.9	148	92	111	139	101	36	103	180	12.1	12.74	86	62	36	184	135
Group2 (with complications)
1	70	1.6	27.3	No	0	Yes	0.5	Yes	6	No	No	No	No	No	No	Tonsillectomy	ACEI	empagliflozin 10mg +metformin 1000 mg	rosuvastatin 10mg	Normal	Normal	1.06	0.7	104	60	75	99	62	4	112	171	6.7	1.66	99	83	36	86	136
2	115	1.82	34.7	No	0	Yes	4	Yes	12	No	No	No	No	No	No	None	ARBS+b-bloker	glibenclamide5mg+metformin 500 mg	rosuvastatin 5 mg	Normal	Normal	1.05	0.9	128	106	113	125	107	31	119	141	7.5	20.3	105	105	35	267	193
3	70	1.7	24.2	No	0	Yes	1	Yes	2	No	No	No	No	No	No	Hystrectomy	B-blocker	vildagliptin 50mg+glimepiride2mg	atorvastatin 80 mg	Normal	Normal	1.13	0.8	101	75	84	97	76	23	102	100	5.9	11.88	102	46	50	66	109
4	75	1.58	30	No	0	Yes	2	Yes	9	No	No	No	No	No	No	None	ARBS	gliclazide 60mg +metformin1000 mg	no	Normal	Normal	1.08	0.8	125	82	96	120	84	30	116	183	6.7	4	103	90	50	184	173
5	90	1.56	37	No	0	Yes	0.75	Yes	9	No	No	No	No	No	No	None	ARBS+CCB	dapagliflozin 10mg+sitagliptin 50mg+metformin 1000mg	Atorvastatin 40 mg	Normal	Normal	1.1	0.8	114	68	83	107	69	32	100	105	6.1	10.64	96	56	47	54	114
6	73	1.7	25.3	Yes	15	Yes	6	Yes	1	No	No	No	No	No	No	None	ACEI+Diuretics	glibenclamide 5 mg +metformin1000 mg	no	Normal	Normal	1.09	0.9	111	82	92	104	84	17	109	179	5.9	9.8	99	104	36	154	171
7	82	1.58	32.8	No	0	Yes	1	Yes	1	No	No	No	No	No	No	None	CCB	gliclazide 60mg +metformin1000 mg	no	Normal	Normal	1.16	0.8	112	76	88	107	77	37	120	146	6.4	2.66	102	200	52	125	277
8	117	1.58	46.9	No	0	Yes	0.58	Yes	7	No	No	No	No	No	No	None	ACEI	glimepride 2mg	rosuvastatin 5 mg	Normal	Normal	1.1	0.8	118	72	87	105	74	21	98	123	5.7	10.85	108	64	20	101	104
9	73	1.54	30.8	No	0	Yes	3	Yes	12	No	No	No	No	No	No	None	B-blocker	gliclazide 60mg	fenofibrate 300mg	Normal	Normal	1.12	0.7	124	72	89	113	74	33	89	91	6.3	9.64	97	98	34	232	178
10	82	1.6	32	No	0	Yes	1	Yes	2	No	No	No	No	No	No	None	B-blocker+Diuretics	gliclazide 60 mg+metformin 500 mg	no	Normal	Normal	1.15	0.6	109	70	83	103	71	21	78	88	6.9	25.15	103	153	41	109	167
11	85	1.7	29.4	No	0	Yes	3	Yes	7	No	No	No	No	No	No	None	ARBS+CCB	gliclazide 30mg+vildagliptin 50 mg	Atorvastatin 40 mg	Normal	Normal	1.13	0.8	119	76	90	105	79	16	108	149	6.3	12.29	107	113	47	113	183
12	100	1.7	34.6	Yes	20	Yes	8	Yes	12	No	No	No	No	No	No	None	b-blocker	glibenclamide 5mg +metformin 850 mg	Atorvastatin 40 mg	Normal	Normal	1.14	0.8	118	92	101	113	93	8	105	107	6.4	23.5	105	88	56	65	157
13	113	1.65	41.5	No	0	Yes	4	Yes	9	No	No	No	No	No	No	None	ARBS+Diuretics	glimepride 2mgg+metformin 1000mg	rosuvastatin 10mg	Normal	Normal	1.19	0.8	105	65	78	97	66	19	109	77	6.1	14.93	103	74	32	173	141
14	90	1.6	35.1	No	0	Yes	0.04	Yes	1	No	No	No	No	No	No	None	CCB	gliclazide 60mg +metformin1000 mg	no	Normal	Normal	1.14	0.7	110	63	79	102	64	33	110	109	6.9	11.33	93	142	48	58	202
15	78	1.7	27	No	0	Yes	0.75	Yes	9	No	No	No	No	No	No	Cholecystectomy	ACEI	empagliflozin 25 mg +metformin 1000 mg+glimepride 2mg	rosuvastatin 20mg	Normal	Normal	1.2	0.8	102	71	81	93	72	22	84	127	5.7	4.42	106	81	40	111	147
16	89	1.62	33.9	No	0	Yes	0.25	Yes	3	No	No	No	No	No	No	None	B-blocker+Diuretics	glibenclamide 5 mg +metformin1000 mg	rosuvastatin 5 mg	Normal	Normal	1.09	0.6	119	81	94	110	83	19	120	148	6.8	7.1	100	50	34	67	98
17	86	1.6	33.6	No	0	Yes	2	Yes	5	No	No	No	No	No	No	None	CCB	vildagliptin 50mg+glimepiride2mg	no	Normal	Normal	1.1	0.8	114	68	83	102	69	30	116	163	6.8	4.5999	106	103	52	144	184
18	85	1.65	31.2	No	0	Yes	3	Yes	12	No	No	No	No	No	No	None	ACEI +Diuretics	glimeperide 2mg	rosuvaststin 5 mg	Normal	Normal	1.2	0.7	108	64	79	98	65	24	133	95	6.4	12.5	99	93	53	44	155
19	80	1.6	31.3	No	0	Yes	1	Yes	6	No	No	No	No	No	No	None	ARBS	gliclazide 60mg +metformin1000 mg	no	Normal	Normal	1.09	0.6	124	80	95	116	82	13	117	82	5.9	4.5	95	129	53	122	206
20	92	1.8	28.4	No	0	Yes	0.33	Yes	4	No	No	No	No	No	No	None	Diuretic	glimepride 2mg	no	Normal	Normal	1.14	0.7	114	80	91	107	81	25	123	184	6.5	6.73	90	126	47	75	164
21	87	1.6	34	No	0	Yes	6	Yes	5	No	No	No	No	No	No	None	ACEI+Diuretics	empagliflozin 25mg+linagliptin 5mg	no	Normal	Normal	1.11	0.8	117	71	86	106	73	21	117	111	6.5	2.66	102	39	54	91	111
22	85	1.65	31.2	No	0	Yes	0.04	Yes	1	No	No	No	No	No	No	None	ARBS	glimepride4 mg +metformin 1000mg	no	Normal	Normal	1.13	0.8	124	78	93	120	79	29	112	179	7	15.71	96	113	51	97	183
23	82	1.69	28.7	No	0	Yes	2	Yes	4	No	No	No	No	No	No	None	B-blocker+Diuretics	Sitagliptin 50mg +metformin 1000mg+gliclazide 60 mg	no	Normal	Normal	1.17	0.8	120	73	89	110	75	20	86	112	5.9	13.09	94	154	39	119	217
24	78	1.6	30.5	No	0	Yes	0.25	Yes	12	No	No	No	No	No	No	None	ACEI+Diuretics	gliclazide 60mg	no	Normal	Normal	1.23	0.8	105	75	85	99	76	10	116	183	6.7	4.22	99	145	32	148	207
25	89	1.82	26.9	No	0	Yes	1.5	Yes	12	No	No	No	No	No	No	Renal stone	CCB	sitagliptin 50mg +metformin 1000mg	rosuvastatin 5 mg	Normal	Normal	1.16	0.7	116	63	81	95	64	20	105	119	6.2	3.98	107	95	31	156	157
26	70	1.62	26.7	No	0	Yes	0.42	Yes	5	No	No	No	No	No	No	None	ACEI+Diuretics	glimepride 4 mg	no	Normal	Normal	1.16	0.8	125	85	98	119	86	20	87	151	6.4	6.85	102	208	59	105	288
27	98	1.8	30.4	Yes	18	Yes	1	Yes	3	No	No	No	No	No	No	None	ARBS	glimepride 4mg+metformin 850 mg	Atorvastatin 40 mg	Normal	Normal	1.21	0.9	115	76	89	101	77	25	90	200	7.7	16.89	93	90	44	131	160
28	70	1.55	29.1	No	0	Yes	3	Yes	12	No	No	No	No	No	No	None	CCB	vildagliptin 50mg+gliclazide 60 mg	rosuvastatin 5mg	Normal	Normal	1.27	0.9	102	80	87	95	81	31	80	154	6.4	5.72	96	139	32	169	204
29	95	1.7	32.9	No	0	Yes	1	Yes	12	No	No	No	No	No	No	None	ACEI+CCB	gliclazide 60mg +metformin1000 mg	Atorvastatin80 mg	Normal	Normal	1.1	0.8	128	83	98	120	84	12	120	115	5.9	2.66	106	44	52	65	109
30	72	1.75	23.5	No	0	Yes	0.67	Yes	1	No	No	No	No	No	No	None	CCB	gliclazide 60mg	rosuvastatin 10mg	Normal	Normal	1.14	0.8	127	86	100	115	88	9	102	116	7	6.45	95	114	34	421	202
31	75	1.65	27.5	Yes	10	Yes	10	Yes	12	No	No	No	No	No	No	None	ACEI	vildagliptin 50 mg+metformin 850 mg	atorvastatin 20mg	Normal	Normal	1.11	0.9	131	87	102	122	89	25	151	221	6.3	9.61	107	99	33	200	172
32	92	1.8	28.4	No	0	Yes	3	Yes	2	No	No	No	No	No	No	None	CCB	empagliflozin 25 +metformin 1000 mg +glimepride 2 mg	Atorvastatin 40 mg	Normal	Normal	1.12	0.7	116	75	89	107	76	20	108	72	5.8	22.03	98	88	74	83	178
33	98	1.68	34.7	No	0	Yes	0.25	Yes	3	No	No	No	No	No	No	GERD	B-blocker+Diuretics	empagliflozin 10mg +linagliptin 5mg	no	Normal	Normal	1.28	0.7	109	75	86	103	76	20	94	174	6.6	8.42	95	110	42	100	95
34	100	1.72	33.8	No	0	Yes	5	Yes	12	No	No	No	No	No	No	None	CC+Diuretics	glimepride 3mg	no	Normal	Normal	1.06	0.7	123	85	98	112	87	23	110	210	6.1	18.989	93	147	31	158	151
35	90	1.57	36.5	No	0	Yes	1	Yes	12	No	No	No	No	No	No	Myomyectomy	ACEI	glibenclamide 5 mg +metformin1000 mg	atorvastatin 80 mg	Normal	Normal	1.18	0.8	128	86	100	114	85	10	101	98	6.2	2.0099	94	39	56	59	107
36	90	1.65	33.1	No	0	Yes	1.5	Yes	5	No	No	No	No	No	No	None	ARBS+Diuretics	gliclazide 30 mg+metformin 500 mg	atorvastatin 20 mg	Normal	Normal	1.17	0.8	120	74	89	113	75	34	82	152	6	4.23	99	102	40	135	169
37	87	1.62	33.1	No	0	Yes	0.33	Yes	4	No	No	No	No	No	No	None	CCB+Diuretis	glimepride 2mg	no	Normal	Normal	1.32	0.8	102	63	76	97	64	9	92	115	6.8	3.38	92	116	31	121	98
38	94	1.56	38.6	No	0	Yes	3	Yes	9	No	No	No	No	No	No	None	ACEI	glibenclamide 5 mg +metformin1000 mg	rosuvastatin 10mg	Normal	Normal	1.22	0.9	118	68	85	110	70	22	88	105	5.9	5.14	98	95	35	143	159
39	80	1.6	31.3	No	0	Yes	2	Yes	12	No	No	No	No	No	No	None	CCB	dapagliflozin 10mg+vildagliptin 50mg+metformin 1000mg	atorvastatin 10+ezetimibe10	Normal	Normal	1.11	0.7	117	67	84	109	69	28	116	90	7	21.42	100	39	48	119	111
40	76	1.6	29.7	No	0	Yes	0.58	Yes	7	No	No	No	No	No	No	None	B-blocker+Diuretics	dapagliflozin 10mg	no	Normal	Normal	1.13	0.6	115	79	91	106	80	32	144	187	6.5	10.34	99	88	33	94	140
41	88	1.62	33.5	No	0	Yes	3	Yes	3	No	No	No	No	No	No	None	ACEI	empagliflozin 10mg	no	Normal	Normal	1.12	0.8	125	89	101	117	91	26	82	111	7.1	3.2	103	136	35	69	170
42	80	1.62	30.5	No	0	Yes	2	Yes	12	No	No	No	No	No	No	None	ARBS	glimepride 4 mg	no	Normal	Normal	1.19	0.7	107	78	88	103	79	21	106	226	6.4	6.97	107	85	53	67	151
43	50	1.6	19.3	No	0	Yes	1	Yes	2	No	No	No	No	No	No	None	CCB	sitagliptin 100mg+pioglitazone 15 mg+metformin 500mg	NO	Normal	Normal	1.08	0.7	118	73	88	110	74	10	91	139	6.4	10.26	104	101	40	102	161
44	80	1.75	26.1	No	0	Yes	1	Yes	12	No	No	No	No	No	No	None	CCB+Diuretis	gliclazide 60 mg	atorvastatin 40 mg	Normal	Normal	1.1	0.8	109	72	84	99	74	27	106	226	6.4	6.02	93	85	53	67	151
45	100	1.8	30.8	Yes	25	Yes	5	Yes	1	No	No	No	No	No	No	None	ACEI+Diuretics	glimepride 2mg+pioglitazone 15 mg	rosuvastatin 10mg	Normal	Normal	1.17	0.9	107	73	84	99	74	18	126	116	6.3	11	101	56	41	60	109
46	80	1.8	24.7	No	0	Yes	0.06	Yes	1	No	No	No	No	No	No	None	ARBS	gliclazide 60mg	no	Normal	Normal	1.12	0.8	125	83	97	119	84	2	91	180	7	7.1	104	124	36	100	139
47	66	1.65	24.2	No	0	Yes	2.5	Yes	8	No	No	No	No	No	No	None	B-blocker+Diuretics	glimepride 4mg+metformin 850 mg	atorvastatin 40mg	Normal	Normal	1.21	0.7	107	88	94	103	89	10	87	156	7.1	18	98	34	56	100	110
48	98	1.8	30.2	No	0	Yes	4	Yes	5	No	No	No	No	No	No	None	ACEI	glibenlamide 5 mg+metformin 850 mg	no	Normal	Normal	1.07	0.8	115	76	89	101	77	25	190	260	7.3	5.22	95	109	70	135	206
49	85	1.75	27.8	No	0	Yes	7	Yes	9	No	No	No	No	No	No	Appendicectomy	CCB	gliclazide 30+metformin 500 mg	rosuvastatin 5mg	Normal	Normal	1.08	0.7	128	90	103	121	91	4	180	240	7.5	11.5	105	72	40	174	146
50	87	1.6	34	No	0	Yes	3.5	Yes	12	No	No	No	No	No	No	None	ACEI+Diuretics	dapagliflozin 10mg+vildagliptin 50mg+metformin 1000mg	rosuvastatin 10mg	Normal	Normal	1.3	0.7	108	82	91	104	83	19	126	105	5.9	12.11	94	74	32	110	129
